# Supplementary material for: SISTEMA: A large and standardized collection of transcriptome data sets for human pluripotent stem cell research
Source: PubMed Central journal article supplement — iScience. 2021 Jun 24;24(7):102767. doi: 10.1016/j.isci.2021.102767 (PMC8271161; doi:10.1016/j.isci.2021.102767), 2021-06-24
Supplement: mmc1.pdf [file mmc1.pdf]

iScience, Volume 24

## **Supplemental information**

**SISTEMA: A large and standardized  
collection of transcriptome data sets for human  
pluripotent stem cell research**

**Margot Jarrige, Hélène Polvèche, Alexandre Carteron, Stéphane Janczarski, Marc Peschanski, Didier Auboeuf, and Cécile Martinat**

A

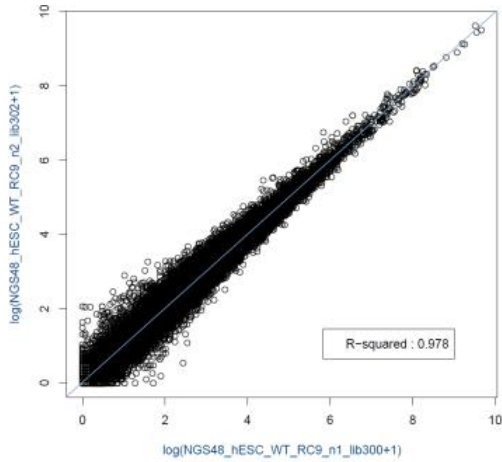

**hESC RC9** (lib300) vs **hESC RC9** (lib 302) :  
 $R^2=97,8$

B

| Frequency | # genes | % genes |
|-----------|---------|---------|
| 1         | 20700   | 98.20   |
| 2         | 348     | 1.65    |
| 3         | 30      | 0.14    |
| 4         | 1       | 0.005   |
| 5         | 1       | 0.005   |

| Frequency | # amplicons | % amplicons |
|-----------|-------------|-------------|
| 1         | 20248       | 97.44       |
| 2         | 454         | 2.18        |
| 3         | 36          | 0.17        |
| 4         | 23          | 0.11        |
| 5         | 7           | 0.03        |
| 6         | 3           | 0.01        |
| 7         | 2           | 0.009       |
| 8         | 3           | 0.01        |
| 9         | 1           | 0.005       |
| 10        | 2           | 0.01        |
| 11        | 1           | 0.005       |
| 12        | 1           | 0.005       |

**Figure S1:** Validation of Ampliseq Technical and informatic treatment workflow (related to Figure 1 and 2)

a) Pearson correlation plot of the same RNA sample processing and sequencing independently:  
 $R^2=97.8$

b) Frequency of genes with 1 or more amplicons (21080 genes). Frequency of amplicons with 1 or more genes (20781 amplicons)

**A**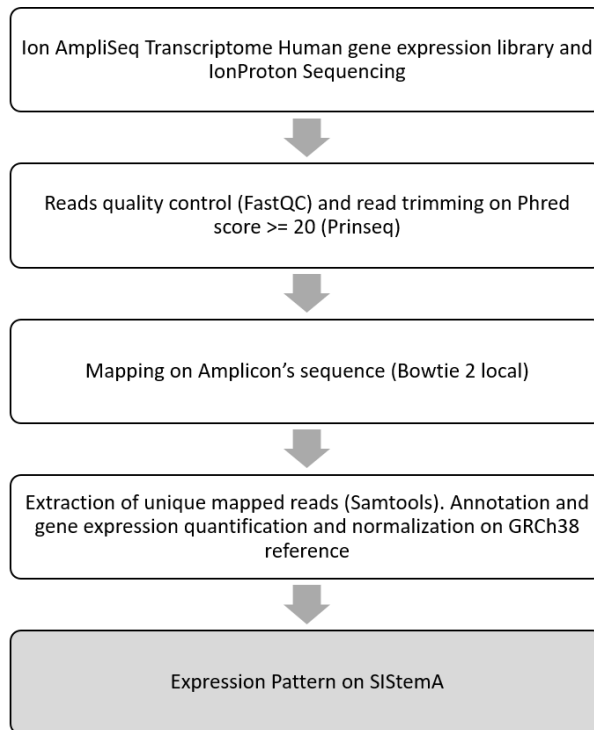**B**

| sample      | Starting Material | deep coverage    | % alignment |
|-------------|-------------------|------------------|-------------|
| mean sample | 50ng              | 10156774 +/- 28% | 97.71       |

**Figure S2:** *Sistema processing and analysis workflow (related to Figure 1 and 2).*

a) Bio-informatic pipeline used for SIsistema

b) Summary of sequencing parameters
